# Supplementary material for: Native adiponectin in serum binds to mammalian cells expressing T-cadherin, but not AdipoRs or calreticulin
Source: eLife journal article supplement (doi:10.7554/elife.48675), 2019-10-24
Supplement: supp [file elife-48675-supp-v1.zip]

Archive with 3 entries (3 files):
- elife_poa_e48675_Figure_1_figure_supplement_2.pdf
- elife_poa_e48675_Transparent_Reporting_File.pdf
- elife_poa_e48675_Figure_1_figure_supplement_1.pdf
