# Supplementary figures and images for: Native adiponectin in serum binds to mammalian cells expressing T-cadherin, but not AdipoRs or calreticulin
Source: eLife journal article supplement (doi:10.7554/elife.48675), 2019-10-24

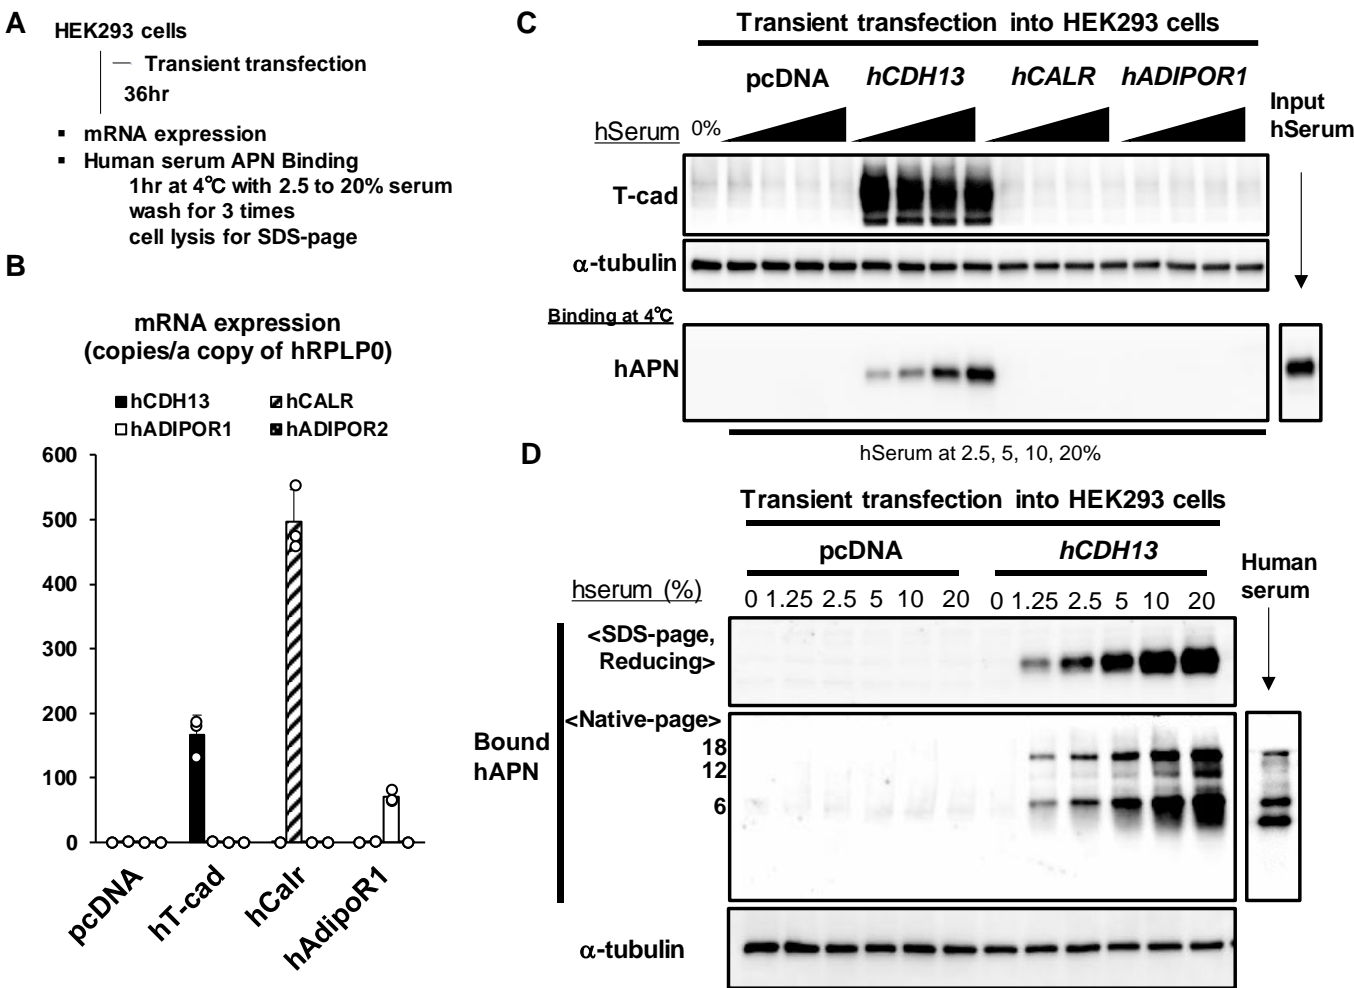

Supplement: supp [file elife-48675-supp-v1.zip › elife_poa_e48675_Figure_1_figure_supplement_2.pdf]

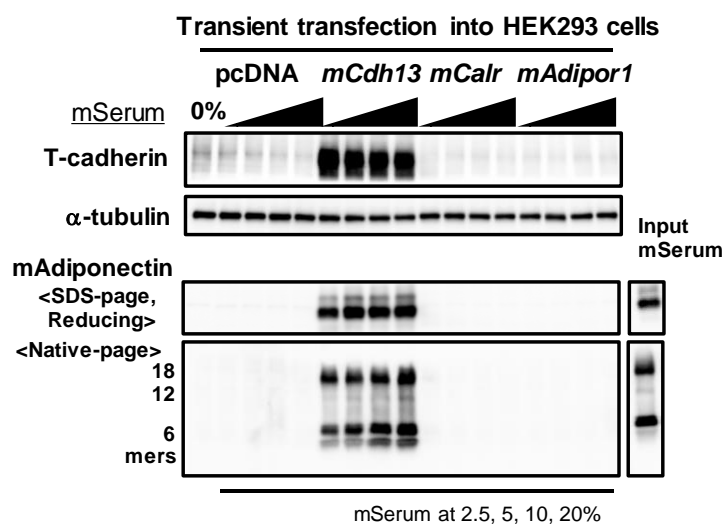

Supplement: supp [file elife-48675-supp-v1.zip › elife_poa_e48675_Figure_1_figure_supplement_1.pdf]
